# Supplementary material
Source: PubMed Central journal article supplement (PMC3509784)
Supplement: NIHMS375985-supplement-supp_materials__stimuli_.pdf [file NIHMS375985-supplement-supp_materials__stimuli_.pdf]

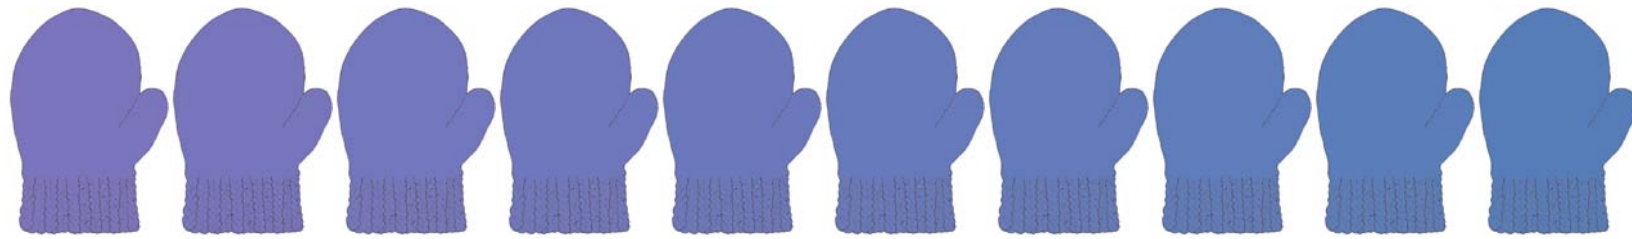

0° (123,117,189) 2° (119,118,189) 4° (115,119,189) 6° (111,120,189) 8° (107,121,188) 10° (103,122,188) 12° (99,123,187) 14° (95,124,187) 16° (91,125,186) 18° (87,125,185)

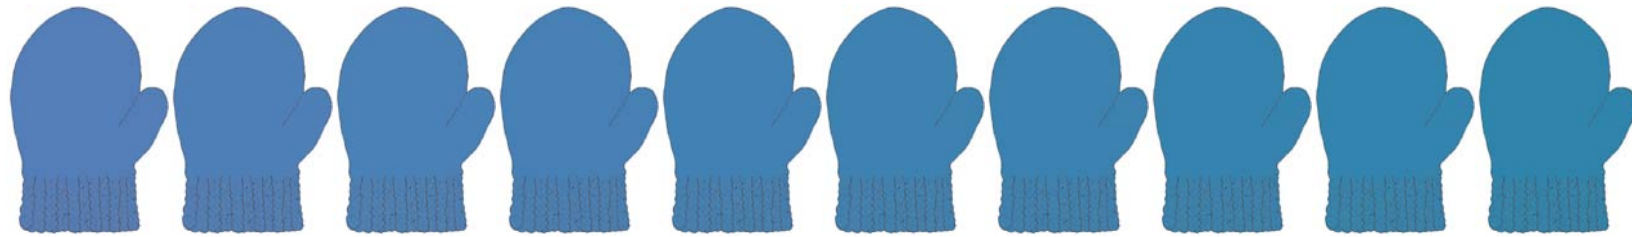

20° (83,126,184) 22° (79,127,183) 24° (74,128,182) 26° (70,128,181) 28° (66,129,179) 30° (62,130,178) 32° (59,130,177) 34° (55,131,175) 36° (51,132,174) 38° (47,132,172)

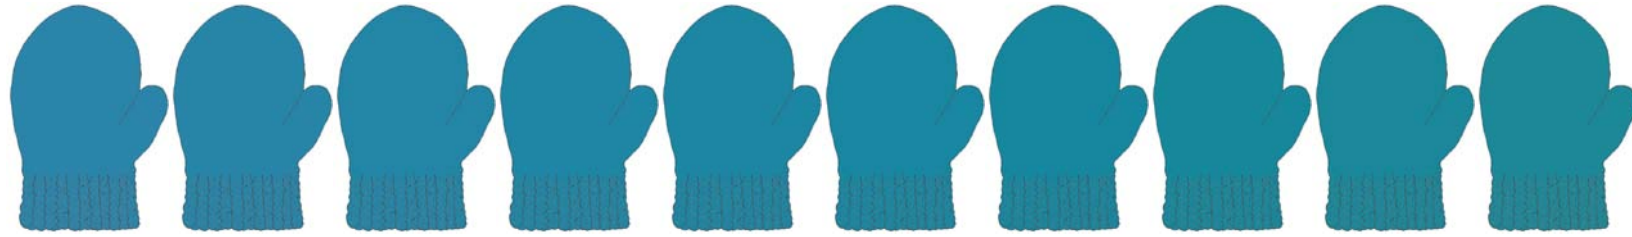

40° (43,133,170) 42° (39,133,168) 44° (35,134,167) 46° (32,134,165) 48° (28,134,163) 50° (25,135,161) 52° (23,135,159) 54° (23,136,156) 56° (26,136,154) 58° (29,136,152)

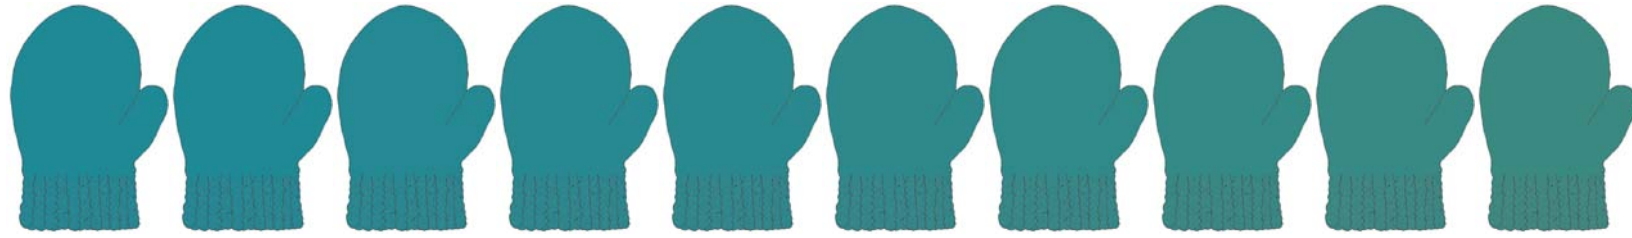

60° (32,137,150) 62° (36,137,147) 64 (39,137,145) 66° (42,137,143) 68° (46,137,140) 70° (49,138,138) 72° (52,138,135) 74° (55,138,133) 76° (58,138,130) 78° (61,138,128)

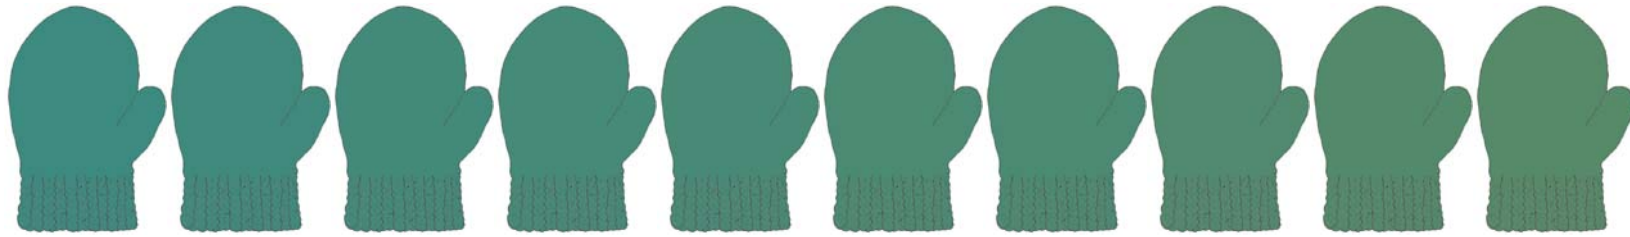

80° (64,138,125) 82° (67,138,123) 84° (70,138,120) 86° (72,138,118) 88° (75,138,115) 90° (78,138,113) 92° (81,138,110) 94° (83,138,108) 96° (86,138,105) 98° (89,138,103)

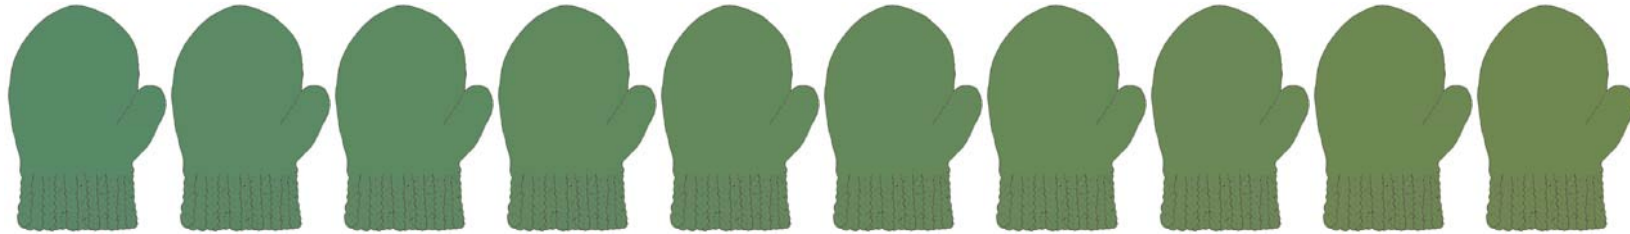

100° (91,138,100) 102° (94,138,98) 104° (96,137,95) 106° (99,137,93) 108° (101,137,90) 110° (104,137,88) 112° (106,137,86) 114° (109,136,83) 116° (111,136,81) L118° (114,136,79)

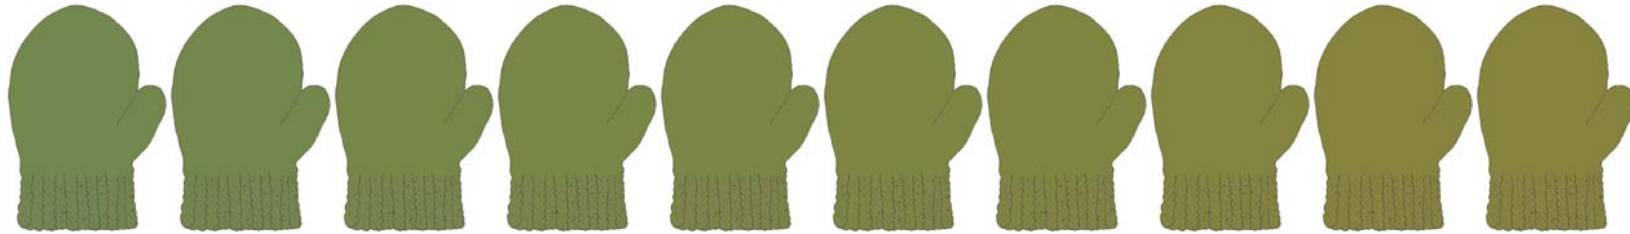

120° (116,135,77) 122° (119,135,74) 124° (121,135,72) 126° (124,134,70) 128° (126,134,68) 130° (129,133,66) 132° (131,133,64) 134° (134,132,62) 136° (136,132,60) 138° (139,131,58)

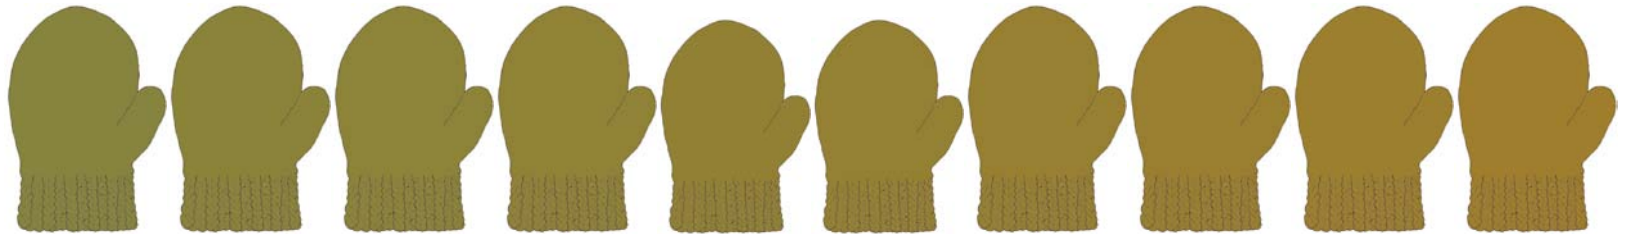

140° (141,131,57) 142° (144,130,55) 144° (146,129,53) 146° (149,129,51) 148° (151,128,50) 150° (154,127,48) 152° (156,127,47) 154° (159,126,45) 156° (161,125,44) 158° (164,124,43)

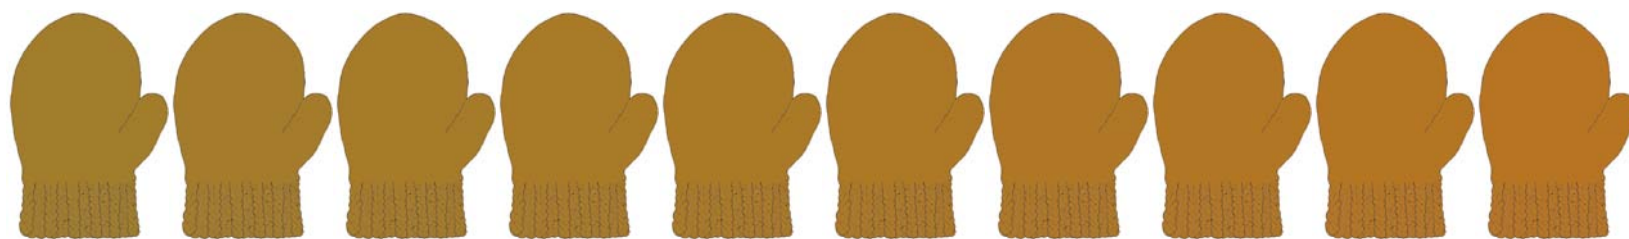

|                      |                      |                      |                      |                      |                      |                      |                      |                      |                      |
|----------------------|----------------------|----------------------|----------------------|----------------------|----------------------|----------------------|----------------------|----------------------|----------------------|
| 160°<br>(166,123,41) | 162°<br>(169,123,40) | 164°<br>(171,122,39) | 166°<br>(173,121,38) | 168°<br>(176,120,38) | 170°<br>(178,119,37) | 172°<br>(181,118,36) | 174°<br>(183,117,36) | 176°<br>(186,116,36) | 178°<br>(188,115,36) |
|----------------------|----------------------|----------------------|----------------------|----------------------|----------------------|----------------------|----------------------|----------------------|----------------------|

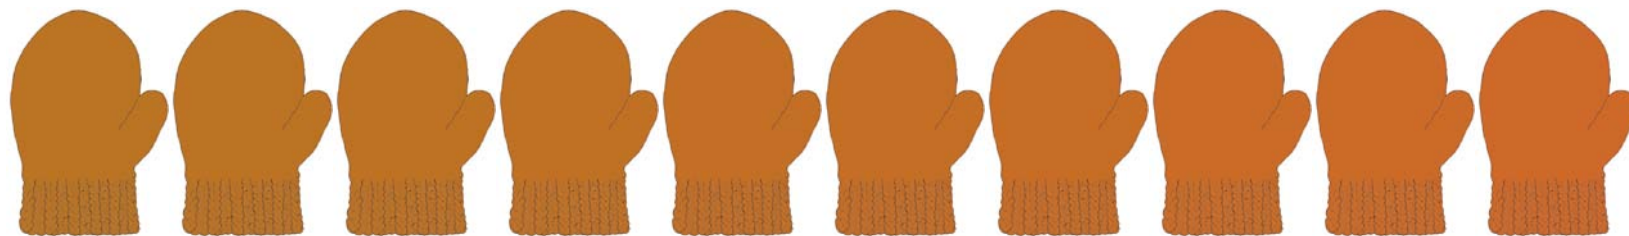

|                      |                      |                      |                      |                      |                      |                      |                      |                      |                      |
|----------------------|----------------------|----------------------|----------------------|----------------------|----------------------|----------------------|----------------------|----------------------|----------------------|
| 180°<br>(190,114,36) | 182°<br>(193,113,37) | 184°<br>(195,111,37) | 186°<br>(197,110,38) | 188°<br>(200,109,38) | 190°<br>(202,108,39) | 192°<br>(204,107,40) | 194°<br>(206,105,41) | 196°<br>(209,104,43) | 198°<br>(211,103,44) |
|----------------------|----------------------|----------------------|----------------------|----------------------|----------------------|----------------------|----------------------|----------------------|----------------------|

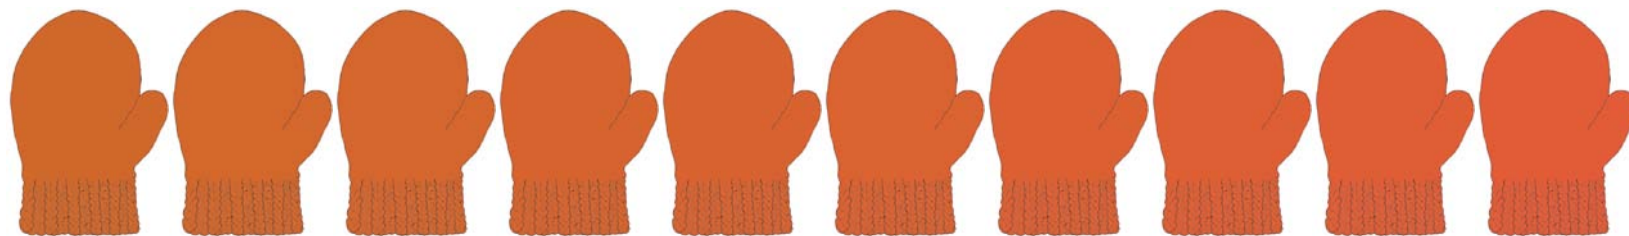

|                      |                      |                     |                     |                     |                     |                     |                     |                     |                     |
|----------------------|----------------------|---------------------|---------------------|---------------------|---------------------|---------------------|---------------------|---------------------|---------------------|
| 200°<br>(213,102,45) | 202°<br>(215,100,46) | 204°<br>(217,99,48) | 206°<br>(219,98,49) | 208°<br>(221,96,51) | 210°<br>(223,95,52) | 212°<br>(224,94,54) | 214°<br>(226,92,56) | 216°<br>(228,91,57) | 218°<br>(230,89,59) |
|----------------------|----------------------|---------------------|---------------------|---------------------|---------------------|---------------------|---------------------|---------------------|---------------------|

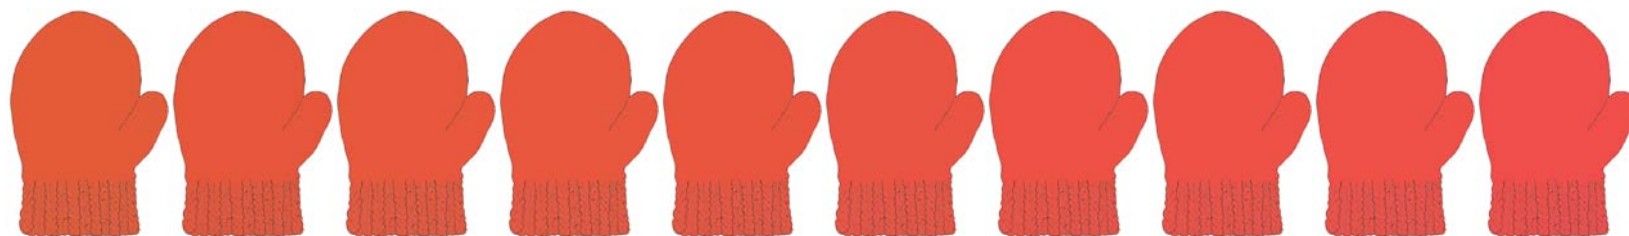

|                     |                     |                     |                     |                     |                     |                     |                     |                     |                     |
|---------------------|---------------------|---------------------|---------------------|---------------------|---------------------|---------------------|---------------------|---------------------|---------------------|
| 220°<br>(231,88,61) | 222°<br>(233,87,63) | 224°<br>(234,85,64) | 226°<br>(235,84,66) | 228°<br>(237,82,68) | 230°<br>(238,81,70) | 232°<br>(239,80,72) | 234°<br>(240,78,74) | 236°<br>(241,77,76) | 238°<br>(242,76,78) |
|---------------------|---------------------|---------------------|---------------------|---------------------|---------------------|---------------------|---------------------|---------------------|---------------------|

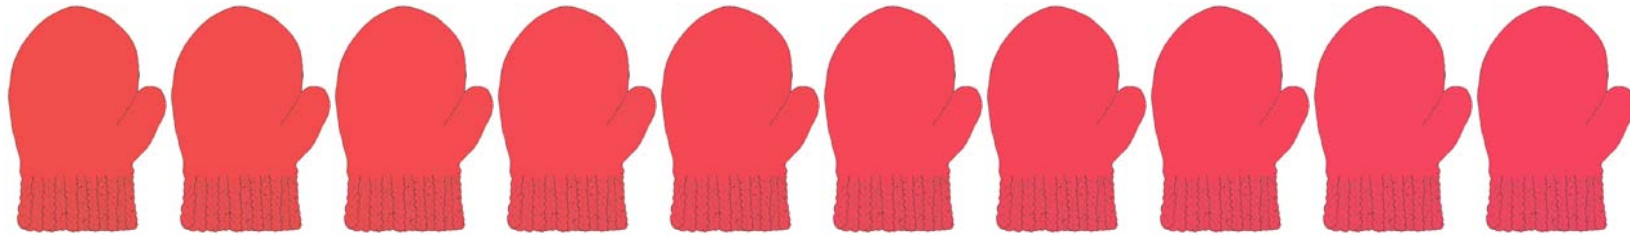

240° (243,75,80) 242° (244,74,83) 244° (244,72,85) 246° (245,71,87) 248° (245,70,89) L250° (246,69,91) 252° (246,69,94) 254° (246,68,96) 256° (246,67,98) 258° (246,67,101)

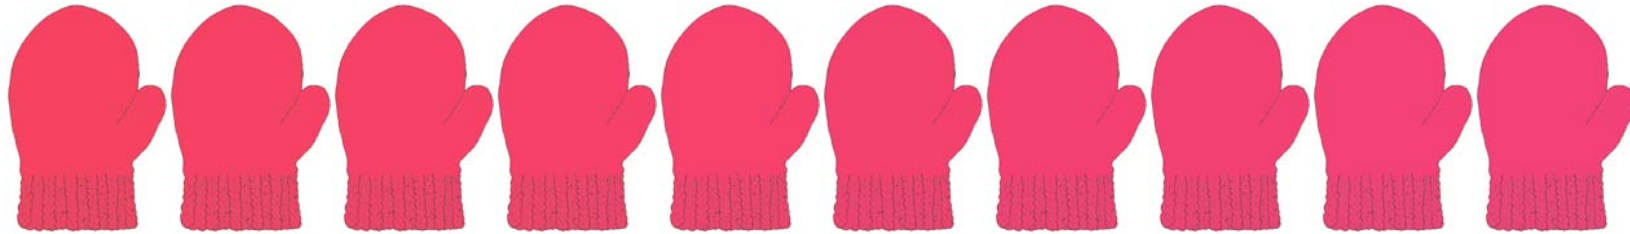

260° (246,66,103) 262° (246,66,106) 264° (246,66,108) 266° (245,65,110) 268° (245,65,113) 270° (244,65,115) 272° (244,66,118) 274° (243,66,120) 276° (242,66,123) 278° (241,67,125)

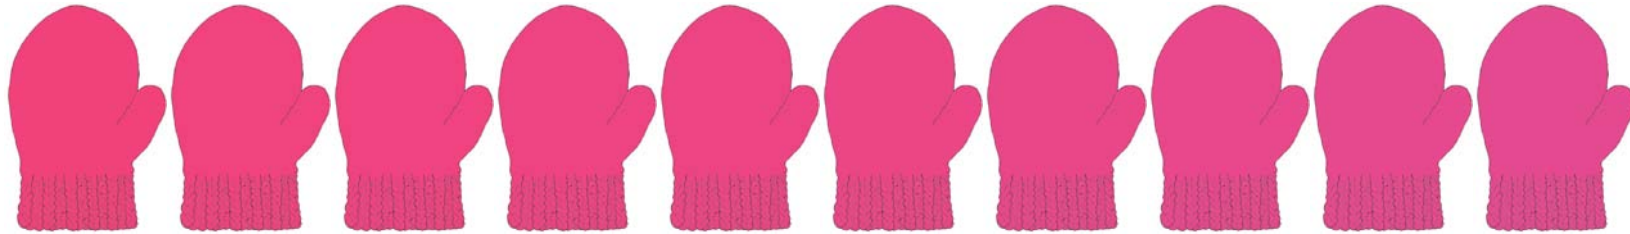

280° (240,67,128) 282° (239,68,130) 284° (237,69,132) 286° (236,70,135) 288° (234,71,137) 290° (233,72,140) 292° (231,73,142) 294° (229,74,144) 296° (227,75,147) 298° (225,76,149)

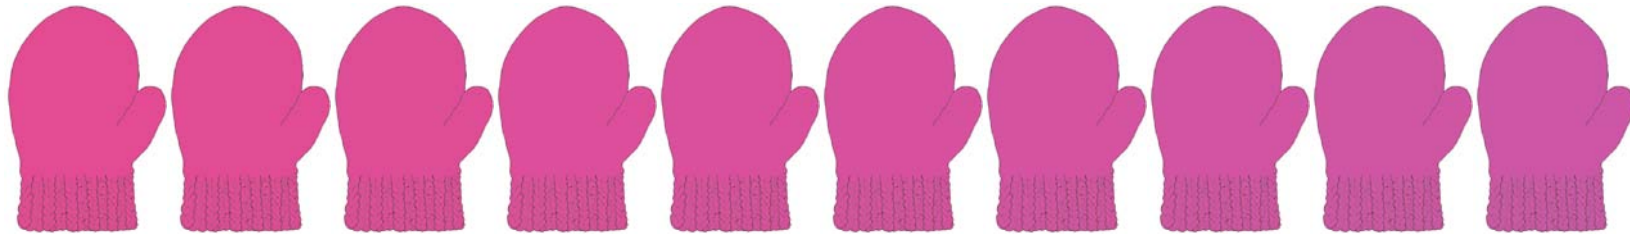

300° (223,77,151) 302° (221,79,154) 304° (218,80,156) 306° (216,81,158) 308° (213,83,160) 310° (211,84,162) 312° (208,86,164) 314° (205,87,166) 316° (202,88,168) 318° (199,90,169)

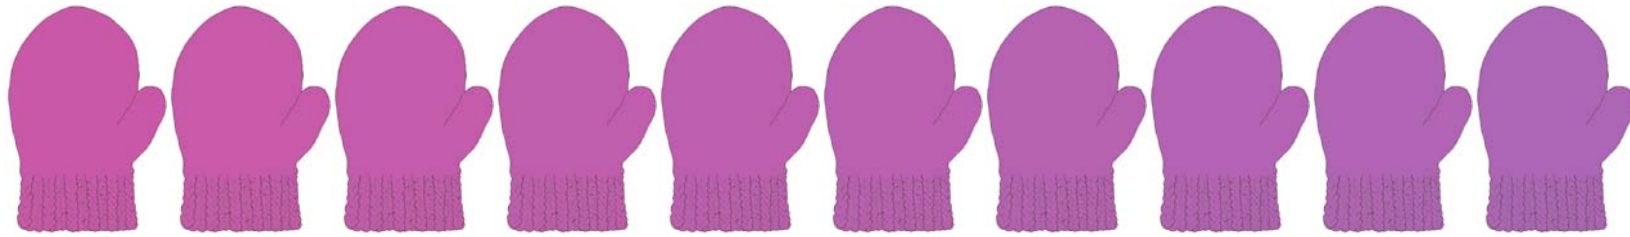

320° (196,91,171) 322° (193,93,173) 324° (190,94,175) 326° (187,96,176) 328° (183,97,177) 330° (180,98,179) 332 (177,100,180) 334° (173,101,181) 336° (170,102,183) 338° (166,104,184)

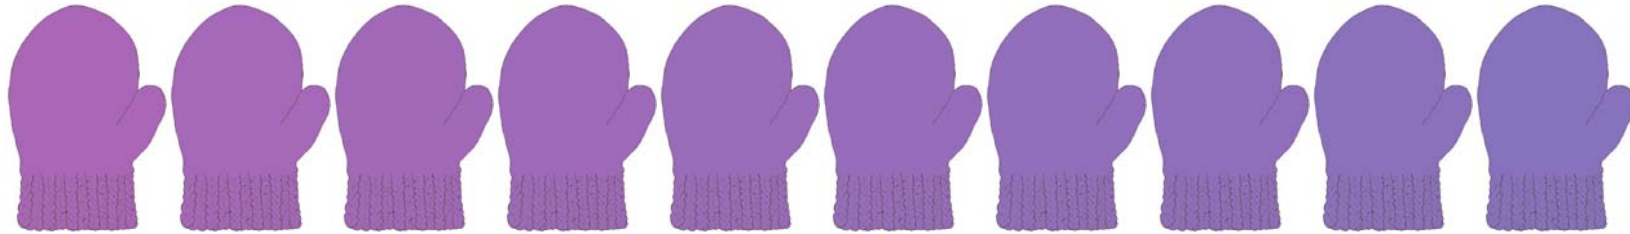

340° (162,105,185) 342° (158,106,185) 344° (155,108,186) L346° (151,109,187) 348° (147,110,187) 350° (143,111,188) 352° (139,113,188) 354° (135,114,189) 356° (131,115,189) 358° (127,116,189)
